# Supplementary material
Source: publisher site journal article supplement (https://www.dovepress.com/article/supplementary_file/590040/590040%20Supplementary%20Material.docx)
Supplement: Supplementary file 1 [file 590040%20Supplementary%20Material.docx]

**Appendix 1.** Search strategies.

MedLine Search Strategy

| 1 | "Value of Life"/ |
| --- | --- |
| 2 | Quality of Life/ |
| 3 | quality of life.ti,kf. |
| 4 | ((instrument or instruments) adj3 quality of life).ab. |
| 5 | Quality-Adjusted Life Years/ |
| 6 | quality adjusted life.ti,ab,kf. |
| 7 | (qaly* or qald* or qale* or qtime* or life year or life years).ti,ab,kf. |
| 8 | disability adjusted life.ti,ab,kf. |
| 9 | daly*.ti,ab,kf. |
| 10 | (sf36 or sf 36 or short form 36 or shortform 36 or short form36 or shortform36 or sf thirtysix or sfthirtysix or sfthirty six or sf thirty six or shortform thirtysix or shortform thirty six or short form thirtysix or short form thirty six).ti,ab,kf. |
| 11 | (sf6 or sf 6 or short form 6 or shortform 6 or sf six or sfsix or shortform six or short form six or shortform6 or short form6).ti,ab,kf. |
| 12 | (sf8 or sf 8 or sf eight or sfeight or shortform 8 or shortform 8 or shortform8 or short form8 or shortform eight or short form eight).ti,ab,kf. |
| 13 | (sf12 or sf 12 or short form 12 or shortform 12 or short form12 or shortform12 or sf twelve or sftwelve or shortform twelve or short form twelve).ti,ab,kf. |
| 14 | (sf16 or sf 16 or short form 16 or shortform 16 or short form16 or shortform16 or sf sixteen or sfsixteen or shortform sixteen or short form sixteen).ti,ab,kf. |
| 15 | (sf20 or sf 20 or short form 20 or shortform 20 or short form20 or shortform20 or sf twenty or sftwenty or shortform twenty or short form twenty).ti,ab,kf. |
| 16 | (hql or hqol or h qol or hrqol or hr qol).ti,ab,kf. |
| 17 | (hye or hyes).ti,ab,kf. |
| 18 | (health* adj2 year* adj2 equivalent*).ti,ab,kf. |
| 19 | (pqol or qls).ti,ab,kf. |
| 20 | (quality of wellbeing or quality of well being or index of wellbeing or index of well being or qwb).ti,ab,kf. |
| 21 | nottingham health profile*.ti,ab,kf. |
| 22 | sickness impact profile.ti,ab,kf. |
| 23 | exp health status indicators/ |
| 24 | (health adj3 (utilit* or status)).ti,ab,kf. |
| 25 | (utilit* adj3 (valu* or measur* or health or life or estimat* or elicit* or disease or score* or weight)).ti,ab,kf. |
| 26 | (preference* adj3 (valu* or measur* or health or life or estimat* or elicit* or disease or score* or instrument or instruments)).ti,ab,kf. |
| 27 | disutilit*.ti,ab,kf. |
| 28 | rosser.ti,ab,kf. |
| 29 | willingness to pay.ti,ab,kf. |
| 30 | standard gamble*.ti,ab,kf. |
| 31 | (time trade off or time tradeoff).ti,ab,kf. |
| 32 | tto.ti,ab,kf. |
| 33 | (hui or hui1 or hui2 or hui3).ti,ab,kf. |
| 34 | (eq or euroqol or euro qol or eq5d or eq 5d or euroqual or euro qual).ti,ab,kf. |
| 35 | duke health profile.ti,ab,kf. |
| 36 | functional status questionnaire.ti,ab,kf. |
| 37 | dartmouth coop functional health assessment*.ti,ab,kf. |
| 38 | or/1-37 |
| 39 | retinal detachment/ |
| 40 | retinal detachmen*.ti,ab,kf. |
| 41 | retinal pigment epithelial detachmen*.ti,ab,kf. |
| 42 | 39 or 40 or 41 |
| 43 | 38 and 42 |

Note: (*) denotes truncation used in the search strategy to capture variations of a root term.

Embase Search Strategy

| 1 | socioeconomics/ |
| --- | --- |
| 2 | exp Quality of Life/ |
| 3 | quality of life.ti,kf. |
| 4 | ((instrument or instruments) adj3 quality of life).ab. |
| 5 | Quality-Adjusted Life Year/ |
| 6 | quality adjusted life.ti,ab,kf. |
| 7 | (qaly* or qald* or qale* or qtime* or life year or life years).ti,ab,kf. |
| 8 | disability adjusted life.ti,ab,kf. |
| 9 | daly*.ti,ab,kf. |
| 10 | (sf36 or sf 36 or short form 36 or shortform 36 or short form36 or shortform36 or sf thirtysix or sfthirtysix or sfthirty six or sf thirty six or shortform thirtysix or shortform thirty six or short form thirtysix or short form thirty six).ti,ab,kf. |
| 11 | (sf6 or sf 6 or short form 6 or shortform 6 or sf six or sfsix or shortform six or short form six or shortform6 or short form6).ti,ab,kf. |
| 12 | (sf8 or sf 8 or sf eight or sfeight or shortform 8 or shortform 8 or shortform8 or short form8 or shortform eight or short form eight).ti,ab,kf. |
| 13 | (sf12 or sf 12 or short form 12 or shortform 12 or short form12 or shortform12 or sf twelve or sftwelve or shortform twelve or short form twelve).ti,ab,kf. |
| 14 | (sf16 or sf 16 or short form 16 or shortform 16 or short form16 or shortform16 or sf sixteen or sfsixteen or shortform sixteen or short form sixteen).ti,ab,kf. |
| 15 | (sf20 or sf 20 or short form 20 or shortform 20 or short form20 or shortform20 or sf twenty or sftwenty or shortform twenty or short form twenty).ti,ab,kf. |
| 16 | (hql or hqol or h qol or hrqol or hr qol).ti,ab,kf. |
| 17 | (hye or hyes).ti,ab,kf. |
| 18 | (health* adj2 year* adj2 equivalent*).ti,ab,kf. |
| 19 | (pqol or qls).ti,ab,kf. |
| 20 | (quality of wellbeing or quality of well being or index of wellbeing or index of well being or qwb).ti,ab,kf. |
| 21 | nottingham health profile*.ti,ab,kf. |
| 22 | nottingham health profile/ |
| 23 | sickness impact profile.ti,ab,kf. |
| 24 | sickness impact profile/ |
| 25 | health status indicator/ |
| 26 | (health adj3 (utilit* or status)).ti,ab,kf. |
| 27 | (utilit* adj3 (valu* or measur* or health or life or estimat* or elicit* or disease or score* or weight)).ti,ab,kf. |
| 28 | (preference* adj3 (valu* or measur* or health or life or estimat* or elicit* or disease or score* or instrument or instruments)).ti,ab,kf. |
| 29 | disutilit*.ti,ab,kf. |
| 30 | rosser.ti,ab,kf. |
| 31 | willingness to pay.ti,ab,kf. |
| 32 | standard gamble*.ti,ab,kf. |
| 33 | (time trade off or time tradeoff).ti,ab,kf. |
| 34 | tto.ti,ab,kf. |
| 35 | (hui or hui1 or hui2 or hui3).ti,ab,kf. |
| 36 | (eq or euroqol or euro qol or eq5d or eq 5d or euroqual or euro qual).ti,ab,kf. |
| 37 | duke health profile.ti,ab,kf. |
| 38 | functional status questionnaire.ti,ab,kf. |
| 39 | dartmouth coop functional health assessment*.ti,ab,kf. |
| 40 | or/1-39 |
| 41 | retinal detachment/ |
| 42 | retinal detachmen*.ti,ab,kf. |
| 43 | retinal pigment epithelial detachmen*.ti,ab,kf. |
| 44 | 41 or 42 or 43 |
| 45 | 40 and 44 |

*Note: The asterisk (*) denotes truncation used in the search strategy to capture variations of a root term.**

Scopus Search Strategy

( ( TITLE-ABS-KEY ( ( retinal detachmen* OR retinal pigment epithelial detachmen* ) ) ) ) AND ( ( TITLE-ABS-KEY ( ( "Value of Life" OR "quality of life" ) ) ) OR ( TITLE-ABS-KEY ( ( "quality adjusted life" OR qaly* OR qald* OR qale* OR qtime* OR "life year" OR "life years" OR "disability adjusted life" OR daly* ) ) ) OR ( TITLE-ABS-KEY ( ( sf36 OR "sf 36" OR "short form 36" OR "shortform 36" OR "short form36" OR "shortform36" OR "sf thirtysx" OR sfthirtysix OR "sfthirty six" OR "sf thirty six" OR "shortform thirtysix" OR "shortform thirty six" OR "short form thirtysix" OR "short form six" OR shortform6 OR "short form6" ) ) ) OR ( TITLE-ABS-KEY ( ( sf6 OR "sf 6" OR "short form 6" OR "shortform 6" OR "sf six" OR sfsix OR "shortform six" OR "short form six" OR "shortform6" OR "short form6" ) ) ) OR ( TITLE-ABS-KEY ( ( sf8 OR "sf 8" OR "sf eight" OR sfeight OR "shortform 8" OR "shortform 8" OR shortform8 OR "short form8" OR "shortform eight" OR "short form eight" ) ) ) OR ( TITLE-ABS-KEY ( ( sf12 OR "sf 12" OR "short form 12" OR "shortform 12" OR "short form12" OR shortform12 OR "sf twelve" OR sftwelve OR "shortform twelve" OR "short form twelve" ) ) ) OR ( TITLE-ABS-KEY ( ( sf16 OR "sf 16" OR "short form 16" OR "shortform 16" OR "short form16" OR shortform16 OR "sf sixteen" OR sfsixteen OR "shortform sixteen" OR "short form sixteen" ) ) ) OR ( TITLE-ABS-KEY ( ( sf20 OR "sf 20" OR "short form 20" OR "shortform 20" OR "short form20" OR "shortform20" OR "sf twenty" OR sftwenty OR "shortform twenty" OR "short form twenty" ) ) ) OR ( TITLE-ABS-KEY ( ( hql OR hqol OR "h qol" OR hrqol OR "hr qol" OR hye OR hyes ) ) ) OR ( TITLE-ABS-KEY ( ( health* W/2 year* W/2 equivalent* ) ) ) OR ( TITLE-ABS-KEY ( ( pqol OR qls OR "quality of wellbeing" OR "quality of well being" OR "index of wellbeing" OR "index of well being" OR qwb OR "nottingham health profile*" ) ) ) OR ( TITLE-ABS-KEY ( ( "sickness impact profile" OR health W/2 ( utilit* OR status ) ) ) ) OR ( TITLE-ABS-KEY ( ( utilit* W/2 ( valu* OR measur* OR health OR life OR estimat* OR elicit* OR disease OR score* OR weight ) ) ) ) OR ( TITLE-ABS-KEY ( ( preference* W/2 ( valu* OR measur* OR health OR life OR estimat* OR elicit* OR disease OR score* OR instrument OR instruments ) ) ) ) OR ( TITLE-ABS-KEY ( ( disutilit* OR rosser OR "willingness to pay" OR "standard gamble*" OR "time trade off" OR "time tradeoff" OR tto OR hui OR hui1 OR hui2 OR hui3 ) ) ) OR ( TITLE-ABS-KEY ( ( eq OR euroqol OR "euro qol" OR eq5d OR "eq 5d" OR euroqual OR "euro qual" OR "duke health profile" OR "functional status questionnaire" OR "dartmouth coop functional health assessment*" ) ) ) )

*Note: The asterisk (*) denotes truncation used in the search strategy to capture variations of a root term.**

**Appendix 2**. Joanna Briggs Institute Critical Appraisal assessments for included studies.


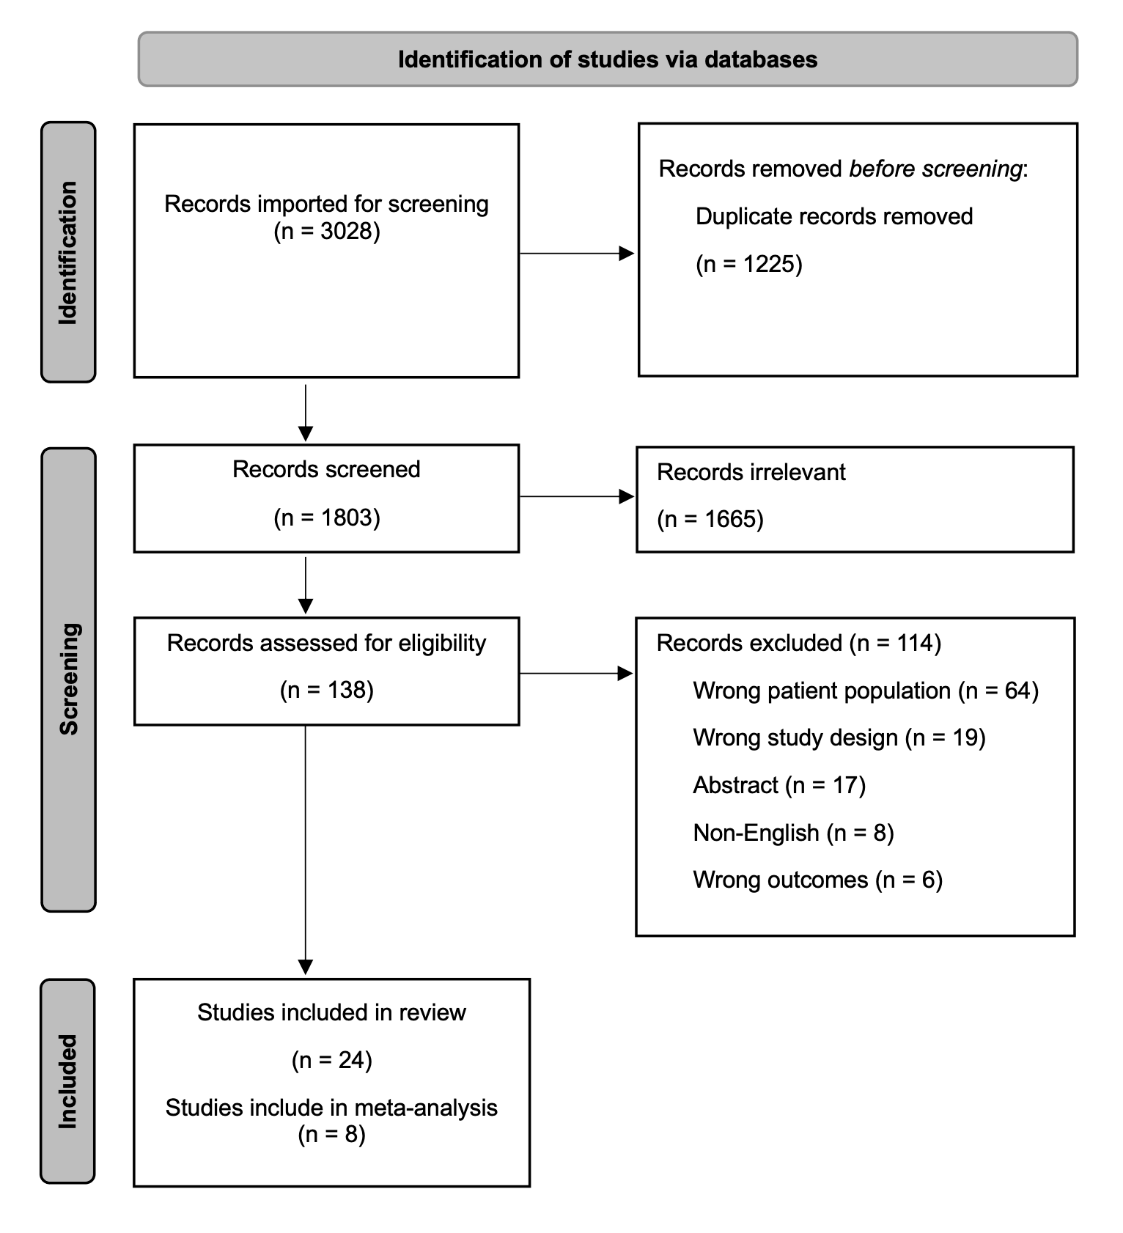


**Figure S1.** PRISMA (Preferred Reporting Items for Systematic Reviews and Meta-Analyses) 2020 flow diagram of study selection process.

**Table S1**. Details of extracted Visual Function Questionnaire 25 (VFQ-25) domain scores.

| Reference | Group | N | General health | General vision | Ocular pain | Near activities | Distance activities | Vision-specific social functioning | Vision-specific mental health | Vision-specific role difficulties | Vision-specific dependency | Driving | Colour vision | Peripheral Vision | VFQ-25 overall composite score |
| --- | --- | --- | --- | --- | --- | --- | --- | --- | --- | --- | --- | --- | --- | --- | --- |
| Casswell 202018 | RRD 6 mo postop face-down positioning | 119 | NR | NR | NR | NR | NR | NR | NR | NR | NR | NR | NR | NR | 89.3 (79.5-95.0) |
| RRD 6 mo postop support-the-break positioning | 120 | NR | NR | NR | NR | NR | NR | NR | NR | NR | NR | NR | NR | 89.0 (79.1-94.4) |
| Casswell 202219 | RRD 6 mo postop with vitrectomy and fast tamponade | 214 | NR | NR | NR | NR | NR | NR | NR | NR | NR | NR | NR | NR | 83.9 (14.4) |
| Doyle 201820 | patients with a blind eye with silicone oil | 17 | 51.5 | 54.1 | 67.4 | 58.3 | 56.3 | 66.9 | 48.1 | 53.759 | 64.6 | 53.1 | 78.1 | 41 | 58.4 |
|  | patients with a blind eye with phthisis | 13 | 51.9 | 53.8 | 68.3 | 60.5 | 55.4 | 69 | 54.4 | 54.8 | 70.5 | 26.2 | 72.9 | 39.6 | 56.9 |
| Du 201921 | RRD patients preop (26 macula on, 32 macula off) | 58 | 54 (43, 65) | 55 (44, 66) | 63 (38, 63) | 58 (42, 75) | 67 (42, 75) | 75 (63, 75) | 50 (38, 63) | 50 (38, 50) | 57 (42, 83) | NR | 70 (50, 100) | 75 (50, 75) | 61 (51, 70) |
| healthy controls | 58 | 65 (60, 76) | 78 (65, 85) | 88 (75, 100) | 92 (83, 100) | 92 (83, 100) | 100 (100, 100) | 88 (81, 100) | 88 (63, 100) | 100 (98, 100) | NR | 100 (75, 100) | 100 (100, 100) | 87 (80, 92) |
| Fabian 201322 | true-positive PTSD in RRD patients postop | 9 | 44.4 ± 24.3 | 66.7 ± 10.0; | 38.9 ± 21.1 | 46.8 ± 23.5 | 47.2 ± 17.2 | 66.7 ± 22.5 | 34.0 ± 20.8 | 40.3 ± 20.5 | 55.6 ± 26.0 | 56.3 ± 29.1 | 83.3 ± 21.7 | 52.8 ± 15.0 | 53.5 ± 13.8 |
| false-positive PTSD in RRD patients postop | 16 | 45.3 ± 20.9 | 63.8 ± 19.6 | 57.0 ± 20.4 | 50.0 ± 26.5 | 56.8 ± 27.0 | 78.1 ± 28.0 | 56.3 ± 25.5 | 58.6 ± 30.2 | 76.1 ± 31.6 | 53.1 ± 40.4 | 82.8 ± 27.0 | 53.1 ± 28.7 | 62.8 ± 22.5 |
| true-negative PTSD in RRD patients postop | 9 | 75.0 ± 21.6 | 80.0 ± 10.0 | 83.3 ± 16.5 | 84.3 ± 17.9 | 88.9 ± 21.2 | 95.8 ± 12.5 | 88.9 ± 17.1 | 88.9 ± 15.9 | 97.2 ± 8.3 | 76.4 ± 32.7 | 97.2 ± 8.3 | 91.7 ± 25.0 | 88.4 ± 14.0 |
| Gauthier 201723 | RRD patients postop within 8 yrs of scleral buckle | 31 | 66.9 ± 25.3 | 71.8 ± 14.3 | 76.6 ± 23.9 | 79.3 ± 21.4 | 77.6 ± 21.0 | 89.9 ± 20.0 | 71.4 ± 28.5 | 72.7 ± 20.2 | 88.0 ± 24.3 | 74.9 ± 21.3 | 94.8 ± 16.4 | 71.5 ± 28.7 | 78.9±19.0 |
| RRD patients postop within 8 yrs of pneumatic retinopexy | 28 | 73.2 ± 25.4 | 75.7 ± 15.7 | 82.6 ± 21.1 | 75.1 ± 20.7 | 81.0 ± 20.0 | 92.0 ± 17.1 | 79.0 ± 24.0 | 77.2 ± 25.9 | 90.6 ± 24.1 | 75.0 ± 27.0 | 93.3 ± 16.1 | 72.3 ± 28.3 | 81.1±19.0 |
| Iannetta 202440 | RRD 6mo postop PR | 76 | 69.23 ± 20.3 | 77.30 ± 19.86 | 91.53 ± 10.41 | 97.56 ± 6.88 | 94.21 ± 13.49 | 97.91 ± 7.05 | 83.65 ± 18.79 | 96.15 ± 9.19 | 99.35 ± 2.28 | 98.06 ± 4.9 | 100 | 98.07 ± 6.8 | 93.96 ± 6.4 |
| Lina 201625 | overall: patients with RRD who had scleral buckle surgery or vitrectomy 12 mo (macula on (10); macula off (20)) | 30 | 75.63± 14.34 | 55.83± 15.65 | 82.92± 11.60 | 77.88± 15.72 | 77.89± 15.67 | 81.25± 13.43 | 74.36± 12.83 | 76.25± 14.06 | 79.72± 14.50 | 71.77± 4.80 | 91.67± 15.16 | 78.33± 10.85 | 76.60± 6.00 |
| RRD patients who had scleral buckle surgery 12mo | 21 | NR | NR | NR | NR | NR | NR | NR | NR | NR | NR | NR | NR | 79.49±14.98 |
| RRD patients who had vitrectomy 12mo | 9 | NR | NR | NR | NR | NR | NR | NR | NR | NR | NR | NR | NR | 73.62±15.12 |
| RRD 12 mo postop (scleral buckling or victrectomy) with macula on | 10 | NR | NR | NR | NR | NR | NR | NR | NR | NR | NR | NR | NR | 88.54±7.95 |
| RRD 12mo postop (scleral buckling or victrectomy) with macula off | 20 | NR | NR | NR | NR | NR | NR | NR | NR | NR | NR | NR | NR | 72.22±14.89 |
| Marquez-Vergara 202327 | RRD preop (macula on vs off not reported) | 23 | NR | 46.09 (12.70) | 85.76 (20.54) | 48.19 (28.42) | 59.78 (34.23) | 67.93 (33.03) | 44.84 (25.95) | 25 (0–50) | 57.61 (35.35) | NR | 90.21 (19.57) | 58.69 (22.12) | 58.04 (18.30) |
| RRD 1mo postop PPV | 23 | NR | 66.67 (10) | 79.16 (20.73) | 49.07 (33.18) | 62.96 (34.45) | 63.89 (36.14) | 51.39 (220.5) | 62.50 (12.50–87.50) | 65.74 (29.30) | NR | 83.33 (21.65) | 75 (33.07) | 61.65 (17.77) |
| RRD 3mo postop PPV | 23 | NR | 65.71 (9.76) | 82.14 (14.17) | 65.48 (12.20) | NR | 65.48 (27.92) | 76.78 (34.93) | 75  (37.50–87.50) | 70.23 (23) | NR | 89.28 (13.36) | 78.57 (22.49) | 67.88 (11.01) |
| Muni 202028 | RRD 3mo postop PR | 81 | 74.4 (16.6) | 73.4 (12.8) | 85.0 (15.8) | 83.2 (12.1) | 87.5 (14.4) | 94.2  (12.8) | 82.1  (18.5) | 84.5 (20.2) | 94.5  (13.4) | 86.9  (14.9) | 95.1 (12.2) | 87.7 (19.6) | 86.5  (12.0) |
| RRD 3mo postop PPV (macula on (39); off (40)) | 79 | 74.1 (15.1) | 67.9  (16.5) | 84.6 (18.7) | 7.9 (18.0) | 80.7 (18.6) | 89.3 (19.3) | 74.4 (23.9) | 77.3 (23.2) | 88.1 (20.5) | 82.6 (16.7) | 93.8 (14.1) | 78.9 (24.0) | 81.0 (15.7) |
| RRD 6mo postop PR | 81 | 74.3 (14.6) | 73.6 (16.2) | 88.0 (15.7) | 85.0 (11.8) | 88.7 (13.4) | 95.8 (9.5) | 84.3 (17.4) | 87.6 (16.4) | 96.1 (10.1) | 84.3 (18.6) | 98.0 (6.9) | 91.6 (16.2) | 88.9 (10.4) |
| RRD 6mo postop PPV | 79 | 74.3 (13.9) | 69.6 (17.4) | 86.8 (14.9) | 81.3 (15.2) | 82.8 (17.1) | 93.8 (12.4) | 78.7 (21.1) | 82.6 (20.6) | 91.1 (18.6) | 83.1 (18.9) | 96.1 (12.2) | 81.2 (24.4) | 84.8 (13.9) |
| RRD 12mo postop PR | 81 | 71.0 (16.4) | 75.4 (14.6) | 86.4 (14.7) | 84.7 (13.7) | 88.7 (15.6) | 92.9 (13.6) | 83.8 (20.3) | 87.1 (19.0) | 93.9 (12.7) | 86.4 (15.8) | 97.0 (10.2) | 89.9  (15.1) | 87.9 (12.3) |
| RRD 12mo postop PPV | 79 | 74.2 (15.3) | 75.6 (15) | 90.3 (11.4) | 86.6 (11.8) | 88.9 (11.8) | 96.6 (8.2) | 83.6 (17.1) | 88.8 (17.1) | 94.7 (13.2) | 86.9 (14.9) | 98.2 (7.7) | 87.3 (19.8) | 88.8 (9.6) |
| Ng 202029 | RRD 12mo postop (vitrectomy (44) and scleral buckling (4)) | 48 | 70 | 65 | 88 | 83 | 94 | 83 | 90 | 100 | 100 | 81 | 100 | 100 | 86 |
| Okamoto 200830 | RRD 6mo postop (scleral buckling (18) or PPV (33)); macula on (18); macula off (33) | 51 | 54.4 ± 17.1 | 71.3 ± 13.4 | 83.3 ± 13.2 | 76.6 ± 16.1 | 76.3 ± 15.8 | 89.2 ± 13.5 | 78.2 ± 17.2 | 79.2 ± 22.0 | 88.1 ± 15.3 | 77.0 ± 22.0 | 94.1 ± 10.7 | 72.5 ± 20.2 | 80.3 ± 12.5 |
|  | normal controls | 46 | 56.0 ± 19.1 | 70.9 ± 14.4 | 81.0 ± 16.4 | 83.0 ± 15.0 | 81.5 ± 15.3 | 90.8 ± 12.0 | 86.4 ± 14.1 | 85.9 ± 17.2 | 96.2 ± 9.4 | 82.0 ± 13.5 | 92.9 ± 11.4 | 82.6 ± 18.2 | 85.2 ± 10.2 |
| Okamoto 20105 | RRD 3mo postop PPV | 55 | 54.2 (16.6) | 70.7 (14.9) | 82.4 (14.7) | 75.3 (17.3) | 75.6 (16.9) | 88.2 (14.9) | 77.5 (18.4) | 78.5 (24.3) | 87.2 (17.3) | 75.5 (24.0) | 94.0 (10.8) | 72.2 (21.0) | 79.6 (14.2) |
| Potic 2021 | RRD preop macula-on | 26 | NR | NR | NR | NR | NR | NR | NR | NR | NR | NR | NR | NR | 86 ± 17 |
| RRD preop macula-off | 21 | NR | NR | NR | NR | NR | NR | NR | NR | NR | NR | NR | NR | 68 ± 26 |
| RRD 1mo postop macula-on | 26 | NR | NR | NR | NR | NR | NR | NR | NR | NR | NR | NR | NR | 79 ± 21 |
| RRD 1mo postop macula-off | 21 | NR | NR | NR | NR | NR | NR | NR | NR | NR | NR | NR | NR | 75 ± 17 |
| RRD 3mo postop macula-on | 26 | NR | NR | NR | NR | NR | NR | NR | NR | NR | NR | NR | NR | 87 ± 19 |
| RRD 3mo postop macula-off | 21 | NR | NR | NR | NR | NR | NR | NR | NR | NR | NR | NR | NR | 79 ± 17 |
| Smretschnig 201633 | RRD 6 mo postop (scleral buckle (14) or PPV (86)); macula on (54); macula off (46) | 100 | 68.3 ± 20.59 | 70.1 ± 17.03 | 47.88 ± 11.66 | 78.33 ± 19.6 | 87.25 ± 16.6 | 91.62 ± 16.55 | 76.87 ± 21.77 | 78.66 ± 22.78 | 90.22 ± 24.64 | 82.44 ± 23.56 | 93.25 ± 17.36 | 87.12 ± 19.35 | 80.02 ± 15.08 |
| normal controls | 107 | 67.73 ± 19.88 | 78.36 ± 16.72 | 48.01 ± 10.88 | 82.66 ± 14.81 | 90.84 ± 12.3 | 95.21 ± 9.4 | 87.5 ± 13.39 | 85.49 ± 15.44 | 95.85 ± 15.99 | 88.82 ± 16.25 | 97.41 ± 9.72 | 91.36 ± 14.2 | 85.47 ± 9.13 |
| RRD 6 mo postop (macula-off) | 47 | 66.54 ± 23.43 | 67.45 ± 19.91 | 47.61 ± 10.31 | 73.57 ± 24.39 | 84.32 ± 21.7 | 87.5 ± 22.03 | 72.39 ± 26.3 | 71.81 ± 27.11 | 83.83 ± 32.21 | 84.27 ± 19.62 | 89.89 ± 23.11 | 84.78 ± 23.26 | 76.31 ± 19.46 |
| RRD fellow eye (better seeing eye) | 74 | 70.54 ± 17.48 | 71.62 ± 14.5 | 47.8 ± 12.65 | 81.36 ± 17.2 | 89.17 ± 13.62 | 93.69 ± 12.55 | 79.21 ± 17.51 | 81.25 ± 18.42 | 94.7 ± 17 | 84.75 ± 20.51 | 95.27 ± 13.52 | 88.36 ± 18.2 | 82.21 ± 11.46 |
| RRD pseudophakic preop; macula off (21); macula on (18) | 39 | 66.78 ± 20.39 | 69.34 ± 18.93 | 46.71 ± 12.22 | 74.89 ± 24.09 | 82.93 ± 22.98 | 87.61 ± 23.78 | 73.84 ± 28.78 | 74.66 ± 26.88 | 83.62 ± 32.38 | 80.83 ± 21.96 | 88.82 ± 24.45 | 84.21 ± 22.07 | 76.38 ± 20.25 |
| RRD 6 mo postop PPV combined with cataract surgery | 47 | 68.4 ± 21.29 | 70.85 ± 16.33 | 47.34 ± 9.73 | 78.8 ± 17.04 | 88.72 ± 10.7 | 92.91 ± 9.98 | 78.4 ± 17.36 | 79.52 ± 20.72 | 93.22 ± 20.06 | 84.38 ± 23.97 | 95.74 ± 10.83 | 88.59 ± 15.55 | 81.52 ± 10.9 |
| van de Put 201434 | RRD 12 mo postop (scleral buckle (10), PPV (45)); all macula off | 55 | 60.5 (21.3) | 71.3 (12.0) | 88.4 (15.2) | 85.6 (13.8) | 86.1 (12.6) | 98.4 (4.8) | 87.6 (14.7) | 88.2 (16.2) | 98.3 (5.4) | 84.2 (17.1) | 97.0 (13.0) | 91.0 (16.3) | 88.9 (7.9) |
| RRD 12 mo postop scleral buckle | 10 | 62.5 (21.2) | 76.0 (8.4) | 90.0 (16.5) | 90.8 (10) | 87.5 (11.9) | 100.0 (0) | 90.0 (12.2) | 98.8 (4.0) | 98.3 (3.5) | 85.4 (24.3) | 100.0 (0) | 92.5 (12.1) | 91.8 (6.0) |
| RRD 12 mo postop PPV | 45 | 60.0 (21.6) | 70.2 (12.5) | 88.1 (15.1) | 84.4 (14.4) | 85.7 (12.9) | 98.1 (5.3) | 87.1 (15.3) | 85.8 (17.0) | 98.3 (5.8) | 83.9 (15.6) | 96.3 (14.3) | 90.7 (17.3) | 88.1 (8.2) |
| van de Put 201535 | RRD 12 mo postop macula-off with metamorphopsia | 40 | NR | NR | NR | NR | NR | NR | NR | NR | NR | NR | NR | NR | 89.5 (1.1) |
| RRD 12 mo postop macula-off without metamorphopsia | 5 | NR | NR | NR | NR | NR | NR | NR | NR | NR | NR | NR | NR | 84.1 (2.3) |
| Yuksel 202036 | RRD 12 mo postop (PPV (15); PPV + cataract surgery (10)); macula on (10); macula off (15) | 25 | 44.00±24.24 | 76.00±14.14 | 73.00±26.68 | 77.56±19.30 | 79.24±16.61 | 86.50±17.65 | 80.56±121.17 | 74.00±20.69 | 92.36±20.69 | 86.00±17.68 | 89.00±19.20 | 77.00±23.85 | 80.89±16.75 |
| control group | 30 | 51.67 ± 20.69 | 78.67 ± 11.67 | 85.00 ± 9.51 | 83.57 ± 9.07 | 85.00 ± 9.94 | 95.00 ± 6.23 | 78.70 ± 16.86 | 67.08 ± 19.28 | 92.30 ± 12.46 | 79.87 ± 13.43 | 90.00 ± 12.46 | 75.00 ± 22.74 | 84.19 ± 6.80 |
| RRD 12 mo postop treated with C3F6 | 16 | 40.63 ± 23.94 | 75.00 ± 13.66 | 74.22 ± 26.80 | 78.00 ± 20.86 | 79.06 ± 18.57 | 85.16 ± 17.21 | 78.63 ± 24.93 | 73.44 ± 29.54 | 89.13 ± 25.23 | 88.00 ± 12.57 | 92.19 ± 17.60 | 78.13 ± 23.94 | 80.16 ± 19.33 |
| RRD 12 mo postop treated with tamponade silicone oil | 9 | 50.00 ± 25.00 | 77.78 ± 15.63 | 70.83 ± 27.95 | 76.78 ± 17.36 | 79.56 ± 13.46 | 88.89 ± 19.21 | 84.00 ± 12.56 | 75.00 ± 31.87 | 98.11 ± 5.67 | 83.20 ± 24.61 | 83.33 ± 21.65 | 75.00 ± 25.00 | 82.19 ± 11.75 |
| RRD 12 mo postop PPV | 15 | 52.50±27.51 | 80.00±13.33 | 80.00±25.82 | 79.80±13.40 | 80.60±15.42 | 80.00±20.58 | 86.95±9.93 | 77.50±31.07 | 96.70±5.85 | 83.14±20.10 | 90.00±17.48 | 77.50±24.86 | 83.91±12.22 |
| RRD 12 mo postop cataract surgery combined with PPV | 10 | 38.33 ± 20.85 | 73.33 ± 14.47 | 68.33 ± 27.09 | 76.07 ± 22.75 | 78.33 ± 17.83 | 90.83 ± 14.54 | 76.30 ± 25.61 | 71.67 ± 29.68 | 89.47 ± 26.25 | 90.00 ± 14.82 | 88.33 ± 20.85 | 76.67 ± 24.03 | 78.88 ± 19.34 |
| RRD 12 mo postop macula on | 10 | 37.50 ± 24.30 | 72.00 ± 10.33 | 71.25 ± 31.76 | 75.80 ± 22.48 | 77.40 ± 19.36 | 81.25 ± 17.92 | 72.00 ± 29.00 | 62.50 ± 31.18 | 85.90 ± 31.21 | 87.33 ± 7.17 | 85.00 ± 21.08 | 70.00 ± 22.97 | 75.64 ± 22.32 |
| RRD 12 mo postop macula off | 15 | 48.33 ± 24.03 | 78.67 ± 15.98 | 74.17 ± 23.84 | 78.73 ± 17.62 | 80.47 ± 15.10 | 90.00 ± 17.17 | 86.27 ± 11.84 | 81.67 ± 27.09 | 96.67 ± 7.61 | 84.67 ± 25.14 | 91.67 ± 18.09 | 81.67 ±24.03 | 84.40 ± 11.31 |
